# Supplementary material for: A polysaccharide derived from Lentinus edodes impairs the immunosuppressive function of myeloid-derived suppressor cells via the p38 pathways
Source: Royal Society of Chemistry journal article supplement (doi:10.1039/c7ra06789e), 2017-01-01
Supplement: c7ra06789e1.pdf [file c7ra06789e1.pdf]

## Supplemental Material

# A polysaccharide derived from *lentinus edodes* impairs the immunosuppressive function of myeloid-derived suppressor cells via the p38 pathways

The primers sequences were listed in Table S1.

Table S1. Primers used for current study

| Description   | Forward 5'-3'           | Reverse 5'-3'            |
|---------------|-------------------------|--------------------------|
| NOS2          | ACTACTGCTGGTGGTGACAA    | GAAGGTGTGGTTGAGTTCTCTAAG |
| TNF $\alpha$  | GGTGCCTATGTCTCAGCCTCTT  | CGATCACCCCGAAGTTCAGTA    |
| TGF $\beta$ 1 | CAACAATTCCTGGCGTTACCT   | TGTATTCCGTCTCCTTGGTTCA   |
| c/EBP $\beta$ | GCCAAGAAGACGGTGGACAAGCT | CTTGAACAAGTTCCGCAGGGTG   |
| HO1           | ACACATCCAAGCCGAGAATG    | GTACAAGGAAGCCATCACCAG    |
| 18S rRNA      | CCGCGTTTCTATTTTGTGGT    | CTCTAGCGGCGCAATACGA      |

Lentinan had no similar effect on MSC2 cells (Supplemental Figure S1).

MPSSS is a polysaccharide derived from *lentinus edodes* with a molecular weight of  $5.772 \times 10^5$  Da. It mainly consists of a  $\beta$ -1,6-linked glucan branched at C-4 with side chains which are also  $\beta$ -1,6-linked-glucans. Here we used a lentinan injection (Jinling Pharmaceutical CO. LTD) as a control group and its structure is  $\beta$ - (1 $\rightarrow$ 3) (1 $\rightarrow$ 6) -D-glucans. The results are shown in Figure S1.

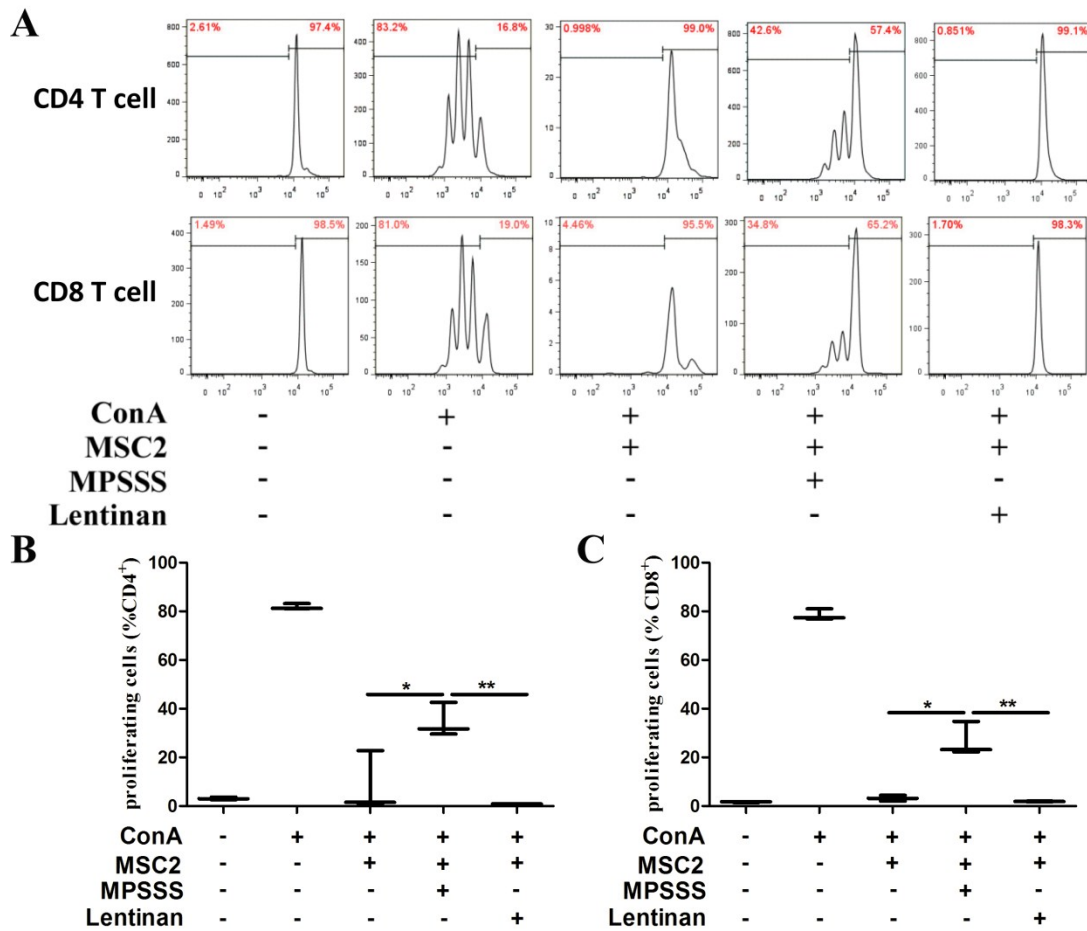

**Figure S1.** MPSSS reserves the immunosuppressive function of MSC2 cells but Lentinan not. (A) CFSE-labeled splenocytes were co-cultured with MSC2 cells which treated with or without 100  $\mu$ g/ml MPSSS or lentinan. Then the co-cultured cells were stimulated with or without 2  $\mu$ g/ml ConA. Quantification of (B) the CD4<sup>+</sup> or (C) CD8<sup>+</sup> cell proliferation was expressed as the mean  $\pm$  SD from triplicate determinations.

Only MPSSS stimulated T cells, there was no proliferation peak. When ConA and MPSSS were both in culture system, there was no different of proliferation peak of T cells as only ConA in culture system, and it indicated that MPSSS had no effect on T cells and T cells proliferation induced by ConA (Supplemental Figure S2).

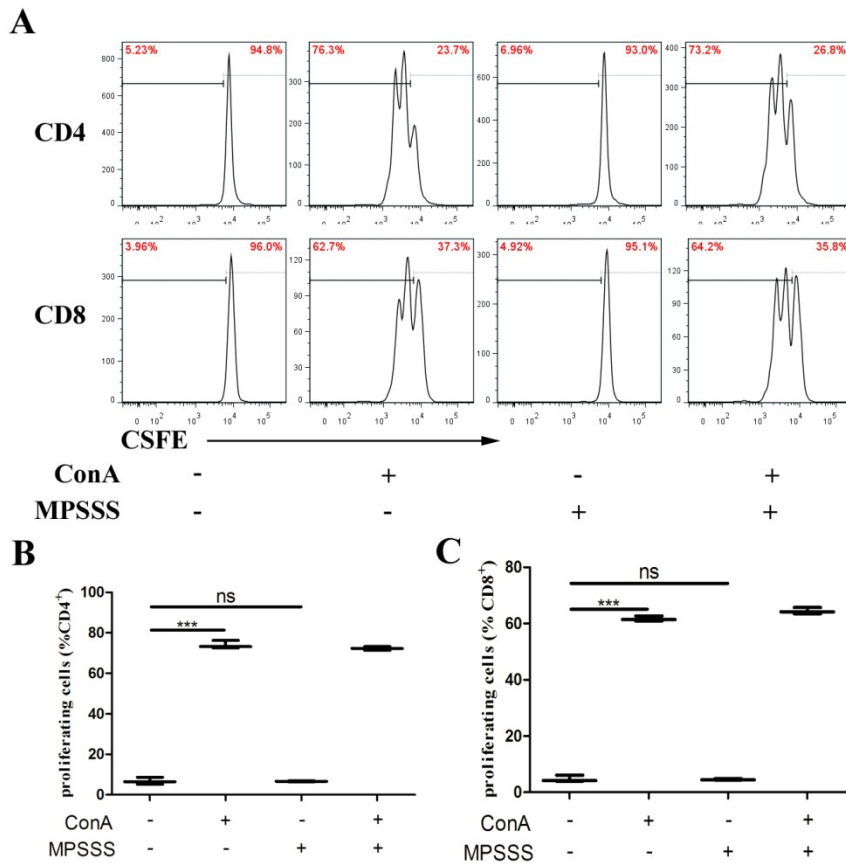

**Figure S2.** MPSSS had no effect on T cells and T cells proliferation induced by ConA. (A) There was no proliferation peak when only T cells, and ConA (2  $\mu\text{g}/\text{ml}$ ) could stimulate T cells to proliferate, and there was also no proliferation when MPSSS (100  $\mu\text{g}/\text{ml}$ ) stimulated T cells. When ConA and MPSSS were both put in culture system, there was no difference to that of only ConA was in culture system. Quantification of (B) the CD4<sup>+</sup> or (C) CD8<sup>+</sup> cell proliferation was expressed as the mean  $\pm$  SD from triplicate determinations.
